# Supplementary material for: Radiometric dating of Middle Pleistocene carbonates: assessing consistency and performance of the U–Th and U–Pb dating methods
Source: Copernicus journal article supplement (doi:10.5194/gchron-7-335-2025), 2025-08-07
Supplement: Supplementary file 1 [file gchron-7-335-2025-supplement.zip]

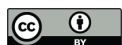

## *Supplement of*

# **Radiometric dating of Middle Pleistocene carbonates: assessing consistency and performance of the U–Th and U–Pb dating methods**

**Timothy J. Pollard et al.**

*Correspondence to:* Timothy J. Pollard ([timothy.pollard@student.unimelb.edu.au](mailto:timothy.pollard@student.unimelb.edu.au))

- [gchron-7-335-2025-supplement-title-page.pdf](#)
- [Supplementary information.pdf](#)
- [Table S2.csv](#)
- [Table S3.csv](#)
- [Table S4.csv](#)
- [Table S5.csv](#)

The copyright of individual parts of the supplement might differ from the article licence.
